# Supplementary material for: Toward the Discovery of a Novel Class of YAP–TEAD Interaction Inhibitors by Virtual Screening Approach Targeting YAP–TEAD Protein–Protein Interface
Source: MDPI journal article supplement (doi:10.3390/cancers10050140), 2018-05-08
Supplement: s1 [file s1]

# Toward the Discovery of a Novel Class of YAP–TEAD Interaction Inhibitors by Virtual Screening Approach Targeting YAP–TEAD Protein–Protein Interface

Floriane Gibault, Mathilde Coevoet, Manon Sturbaut, Amaury Farce, Nicolas Renault, Frédéric Allemand, Jean-François Guichou, Anne-Sophie Drucbert, Catherine Foulon, Romain Magnez, Xavier Thuru, Matthieu Corvaisier, Guillemette Huet, Philippe Chavatte, Patricia Melnyk, Fabrice Bailly and Philippe Cotelle

*Supplementary Material*

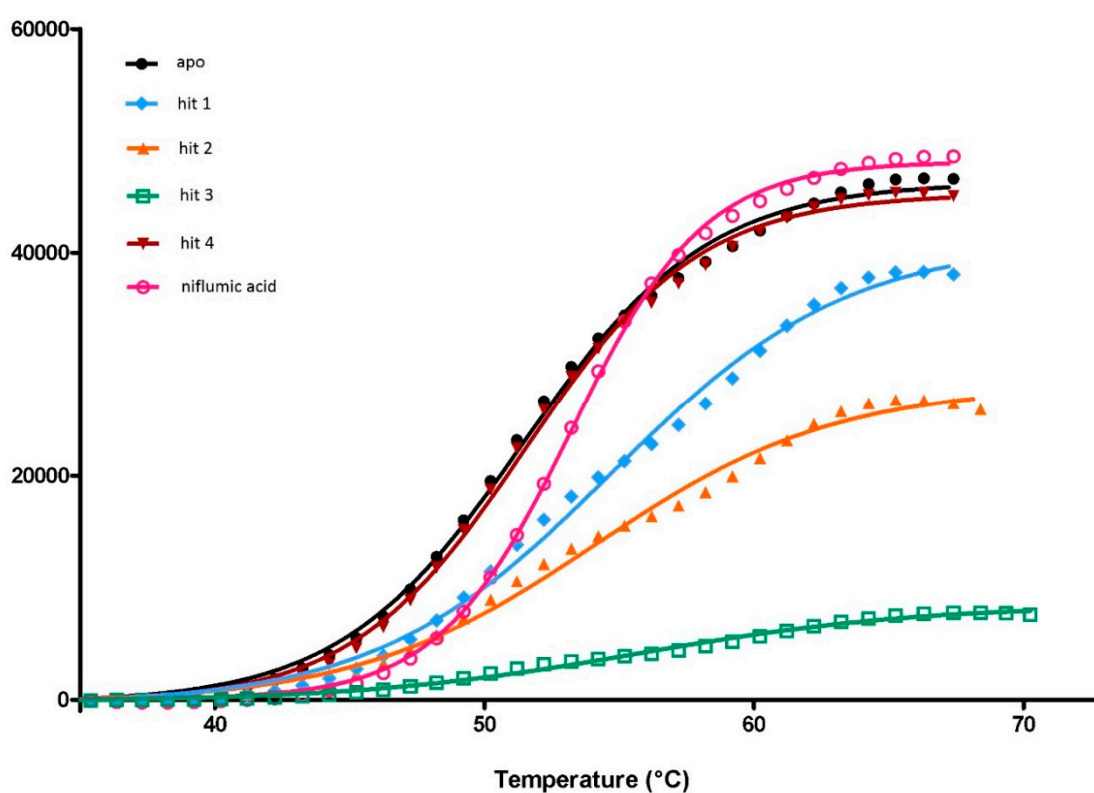

**Figure S1.** Representative normalized graphs showing a shift in thermal stability of hTEAD2<sub>217–447</sub> in presence of the potential TEAD2 binders 1-4 and niflumic acid. Apo refers to the melting curve of the protein alone.

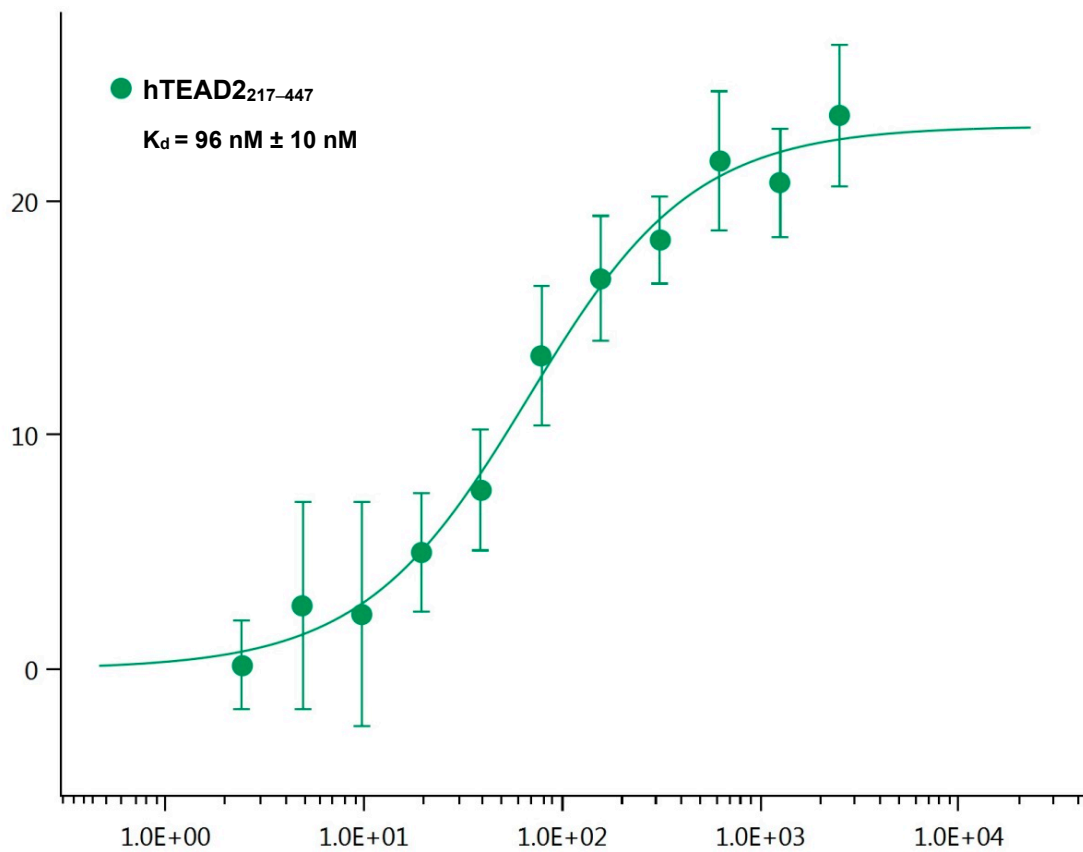

**Figure S2.** Dose-response curve for the binding interaction between hTEAD2<sub>217-447</sub> and YAP. The concentration of hTEAD2<sub>217-447</sub> is kept constant at 10 nM while the YAP<sub>50-102</sub> concentration varies from 10  $\mu$ M to 4.8 nM.
